# Supplementary material
Source: publisher figshare collection journal article supplement (https://acs.figshare.com/ndownloader/files/5692788)

## SUPPORTING INFORMATION

**Reactivity of the B–H bond in *Tris*(pyrazolyl)hydroborato Zinc Complexes: An Unexpected Example of Zinc Hydride Formation in a Protic Solvent and its Relevance towards Hydrogen Transfer to NAD<sup>+</sup> Mimics by *Tris*(pyrazolyl)hydroborato Zinc Complexes in Alcoholic Media**

Catherine Bergquist, Lawrence Koutcher, Amanda L. Vaught, and Gerard Parkin,\*

*Department of Chemistry,*

*Columbia University,*

*New York, New York 10027, USA.*

*Received xxxx xx, 2001.*

---

### Experimental Details

### General Considerations

$[\text{Tp}^{\text{Bu}^t, \text{Me}}]\text{ZnOH}$ ,<sup>1</sup>  $[\text{Tp}^{\text{Bu}^t, \text{Me}}]\text{ZnOH}_2$ ,<sup>2</sup> 10-methylacridinium perchlorate<sup>3</sup> (*caution!*) and 10-methylacridan,<sup>4</sup> were prepared by literature methods.

### Reduction of 10-Methylacridinium Perchlorate by $[\text{Tp}^{\text{Bu}^t, \text{Me}}]\text{ZnOH}$ in ROH

$[\text{Tp}^{\text{Bu}^t, \text{Me}}]\text{ZnOH}$  (3 mg, 0.006 mmol) was added to a solution of 10-methylacridinium perchlorate (3 mg, 0.01 mmol) in *ca.* 0.6 mL deuterio-ROH ( $\text{R} = \text{Me}, \text{Et}, \text{Pr}^i$ ). The mixture was heated at 80°C for 15 hours,<sup>5</sup> resulting in the formation of 10-methylacridan and 3-*tert*-butyl-5-methylpyrazole, as demonstrated by  $^1\text{H}$  NMR spectroscopy. The spectroscopic yield of 10-methylacridan (based on total amount of added  $[\text{Tp}^{\text{Bu}^t, \text{Me}}]\text{ZnOH}$ ) was *ca.* 85%. In the absence of  $[\text{Tp}^{\text{Bu}^t, \text{Me}}]\text{ZnOH}$ , no reaction was observed between 10-methylacridinium perchlorate and ROH under the same conditions. The analogous reaction between deuterium labeled  $[\text{DTp}^{\text{Bu}^t, \text{Me}}]\text{ZnOH}$  and 10-methylacridinium perchlorate in  $\text{CH}_3\text{OH}$  was monitored by  $^2\text{H}$  NMR spectroscopy, confirming that deuterium was incorporated into the methylene group.

### Reduction of 10-Methylacridinium Perchlorate by $[\text{Tp}^{\text{Bu}^t, \text{Me}}]\text{ZnOH}$ in THF

A suspension of  $[\text{Tp}^{\text{Bu}^t, \text{Me}}]\text{ZnOH}$  (3 mg, 0.006 mmol) and 10-methylacridinium perchlorate (3 mg, 0.01 mmol) in  $d_8$ -THF (*ca.* 0.6 mL) was heated at 80°C for 1 day, resulting in the formation of 10-methylacridan, as demonstrated by  $^1\text{H}$  NMR spectroscopy.

### Reduction of 10-Methylacridinium Perchlorate by $[\text{Tp}^{\text{Bu}^t, \text{Me}}]\text{Ti}$ in MeOH

$[\text{Tp}^{\text{Bu}^t, \text{Me}}]\text{Ti}$  (3 mg, 0.005 mmol) was added to a solution of 10-methylacridinium perchlorate (3 mg, 0.01 mmol) in  $\text{CD}_3\text{OD}$  (*ca.* 0.6 mL). The reaction was monitored by  $^1\text{H}$  NMR spectroscopy which demonstrated the presence of 10-methylacridan and 3-*tert*-butyl-5-methylpyrazole upon mixing. The mixture was heated at 80°C for 2.5 hours to complete the reaction forming a *ca.* 1:3 molar ratio of 10-methylacridan and 3-*tert*-butyl-

5-methylpyrazole. The analogous reaction between deuterium labeled  $[\text{DTp}^{\text{Bu}^t, \text{Me}}]\text{I}$  and 10-methylacridinium perchlorate in  $\text{CH}_3\text{OH}$  was monitored by  $^2\text{H}$  NMR spectroscopy, confirming that deuterium was incorporated into the methylene group.

#### Reaction of $\{[\text{Tp}^{\text{Bu}^t, \text{Me}}]\text{ZnOH}_2\}[\text{HOB}(\text{C}_6\text{F}_5)_3]$ towards Methanol

(a) A solution of  $\{[\text{Tp}^{\text{Bu}^t, \text{Me}}]\text{ZnOH}_2\}[\text{HOB}(\text{C}_6\text{F}_5)_3]$  (ca. 3 mg) in  $\text{CD}_3\text{OD}$  (ca. 0.6 mL) was monitored by  $^1\text{H}$  NMR and  $^{19}\text{F}$  spectroscopy. After ca. 30 minutes,  $^1\text{H}$  NMR spectroscopy demonstrated the presence of  $[\text{Tp}^{\text{Bu}^t, \text{Me}}]\text{ZnH}$ ,<sup>6</sup> 3-*tert*-butyl-5-methylpyrazole, and an unidentified complex which has a spectrum consistent with  $\{[\text{Tp}^{\text{Bu}^t, \text{Me}}]\text{ZnL}\}^+$ , where L is possibly  $\text{MeOH}$  or  $\text{H}_2\text{O}$ . Over a period of hours, small quantities of  $[\text{Tp}^{\text{Bu}^t, \text{Me}}]\text{ZnF}$ <sup>7</sup> were generated as the mixture decomposed.  $^1\text{H}$  NMR spectrum of  $[\text{Tp}^{\text{Bu}^t, \text{Me}}]\text{ZnH}$  ( $\text{CD}_3\text{OD}$ ): 1.37 [s, 3( $\text{C}(\text{CH}_3)_3$ )], 2.39 [s, 3( $\text{CH}_3$ )], 4.56 [s,  $\text{ZnH}$ ] 5.83 [s, 3( $\text{C}_3\text{N}_2\text{H}$ )],  $\text{HB}$  not observed.  $^1\text{H}$  NMR spectrum of  $[\text{Tp}^{\text{Bu}^t, \text{Me}}]\text{ZnF}$  ( $\text{CD}_3\text{OD}$ ): 1.35 [s, 3( $\text{C}(\text{CH}_3)_3$ )], 2.41 [s, 3( $\text{CH}_3$ )], 5.91 [d,  $J = 0.3$ , 3( $\text{C}_3\text{N}_2\text{H}$ )],  $\text{HB}$  not observed.  $^1\text{H}$  NMR spectrum of  $\{[\text{Tp}^{\text{Bu}^t, \text{Me}}]\text{ZnL}\}^+$  ( $\text{CD}_3\text{OD}$ ): 1.38 [s, 3( $\text{C}(\text{CH}_3)_3$ )], 2.40 [s, 3( $\text{CH}_3$ )], 5.95 [s, 3( $\text{C}_3\text{N}_2\text{H}$ )],  $\text{HB}$  not observed.

(b) A similar experiment was performed with the deuterium labeled  $\{[\text{Tp}^{\text{Bu}^t, \text{Me}}]\text{ZnOD}_2\}[\text{DOB}(\text{C}_6\text{F}_5)_3]$  in  $\text{CD}_3\text{OD}$ . Formation of the protio complex  $[\text{Tp}^{\text{Bu}^t, \text{Me}}]\text{ZnH}$  was demonstrated by  $^1\text{H}$  NMR spectroscopy.

(c) An analogous experiment was performed with the deuterium labeled complex,  $\{[\text{DTp}^{\text{Bu}^t, \text{Me}}]\text{ZnOH}_2\}[\text{HOB}(\text{C}_6\text{F}_5)_3]$ , in  $\text{CD}_3\text{OD}$ . Formation of the deutero complex  $[\text{DTp}^{\text{Bu}^t, \text{Me}}]\text{ZnD}$  was demonstrated by removing the volatile components and obtaining the  $^2\text{H}$  NMR spectrum in  $\text{C}_6\text{H}_6$ .

#### References

- (1) Looney, A.; Han, R.; McNeill, K.; Parkin, G. *J. Am. Chem. Soc.* **1993**, *115*, 4690-4697.

- (2) Bergquist, C.; Parkin, G. *J. Am. Chem. Soc.* **1999**, *121*, 6322-6323.
- (3) Fukuzumi, S.; Fujita, M.; Maruta, J.; Chanon, M. *J. Chem. Soc., Perkin Trans. 2* **1994**, 1597-1602.
- (4) Ostovic, D.; Lee, I. H.; Roberts, R. M. G.; Kreevoy, M. M. *J. Org. Chem.* **1985**, *50*, 4206-4211.
- (5) The initial spectrum at room temperature in CD<sub>3</sub>OD indicated the presence of 10-methylacridan and 3-*tert*-butyl-5-methylpyrazole.
- (6) Bergquist, C.; Parkin, G. *Inorg. Chem.* **1999**, *38*, 422-423.
- (7) (a) Kläui, W.; Schilde, U.; Schmidt, M. *Inorg. Chem.* **1997**, *36*, 1598-1601.  
(b) The <sup>1</sup>H NMR data that was reported in the literature is incorrect due to an error in the solvent referencing (Kläui, W., personal communication).

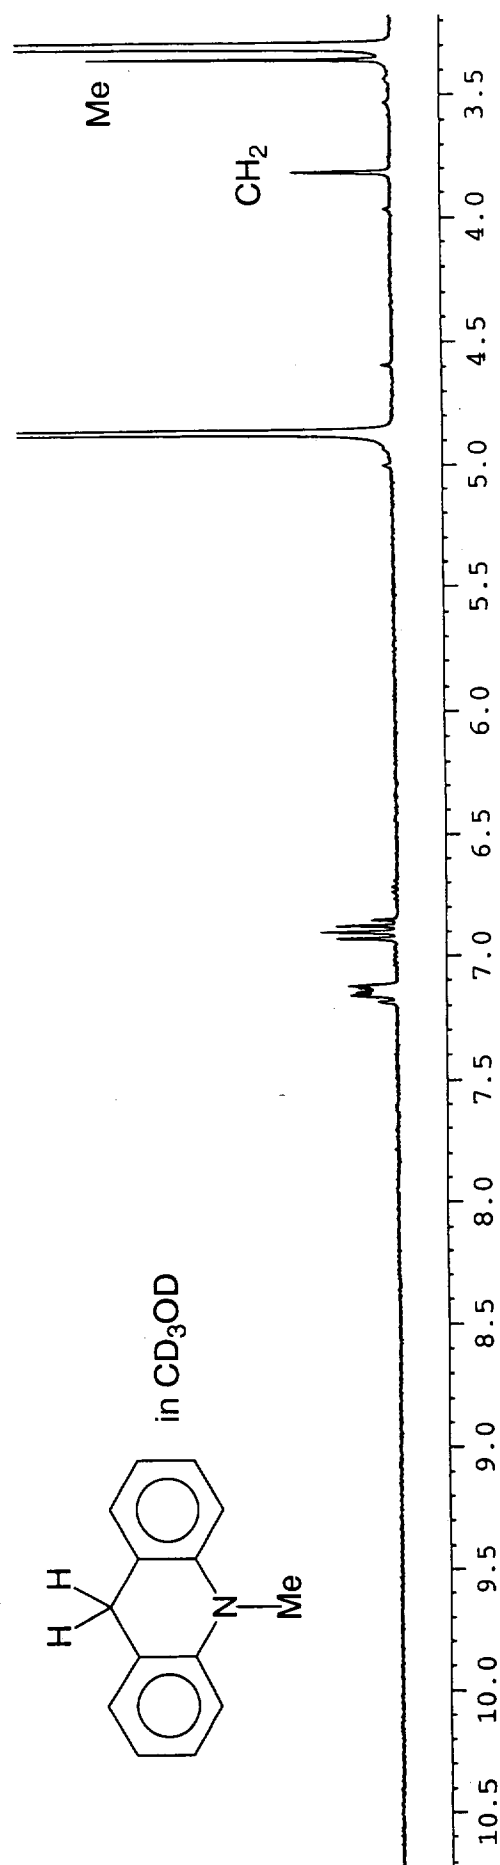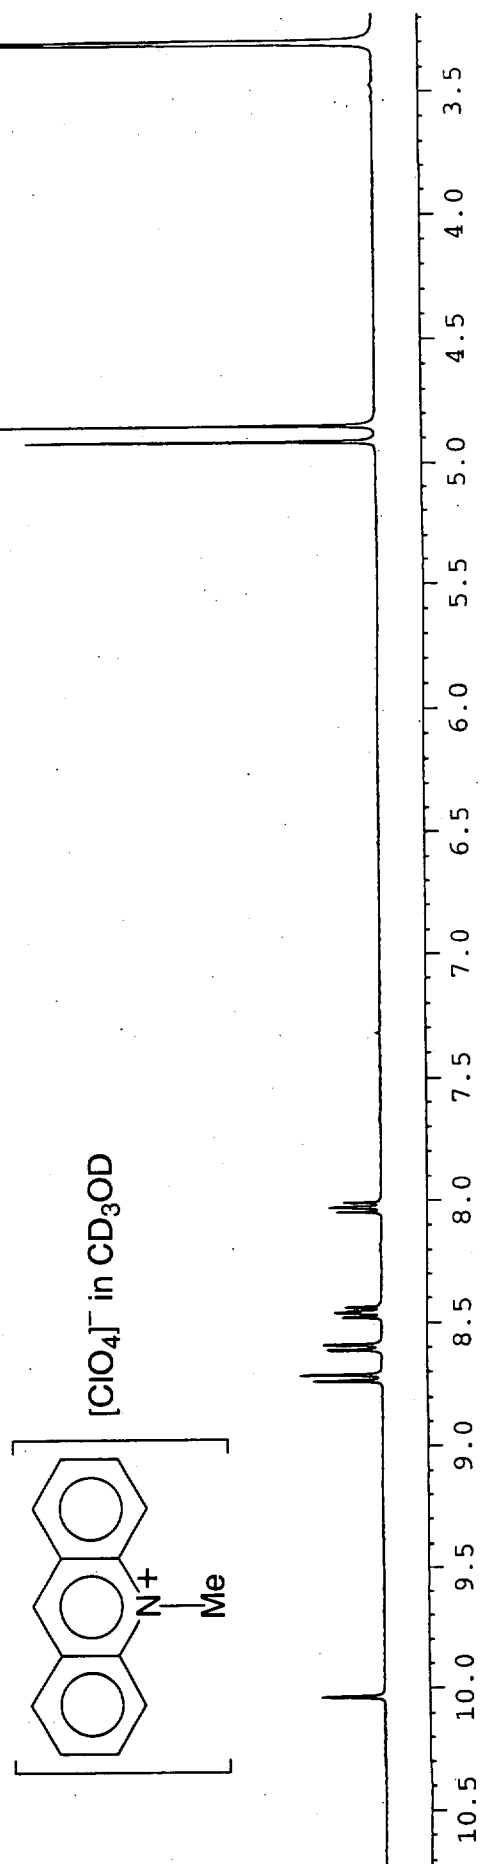

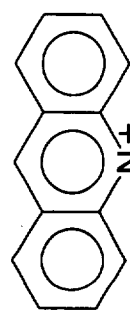

$[\text{Tp}^t\text{Bu,Me}] \text{ZnOH}$  in  $\text{CD}_3\text{OD}$

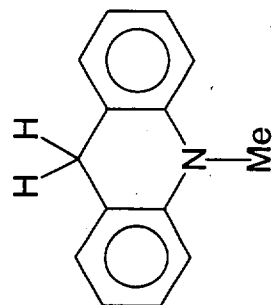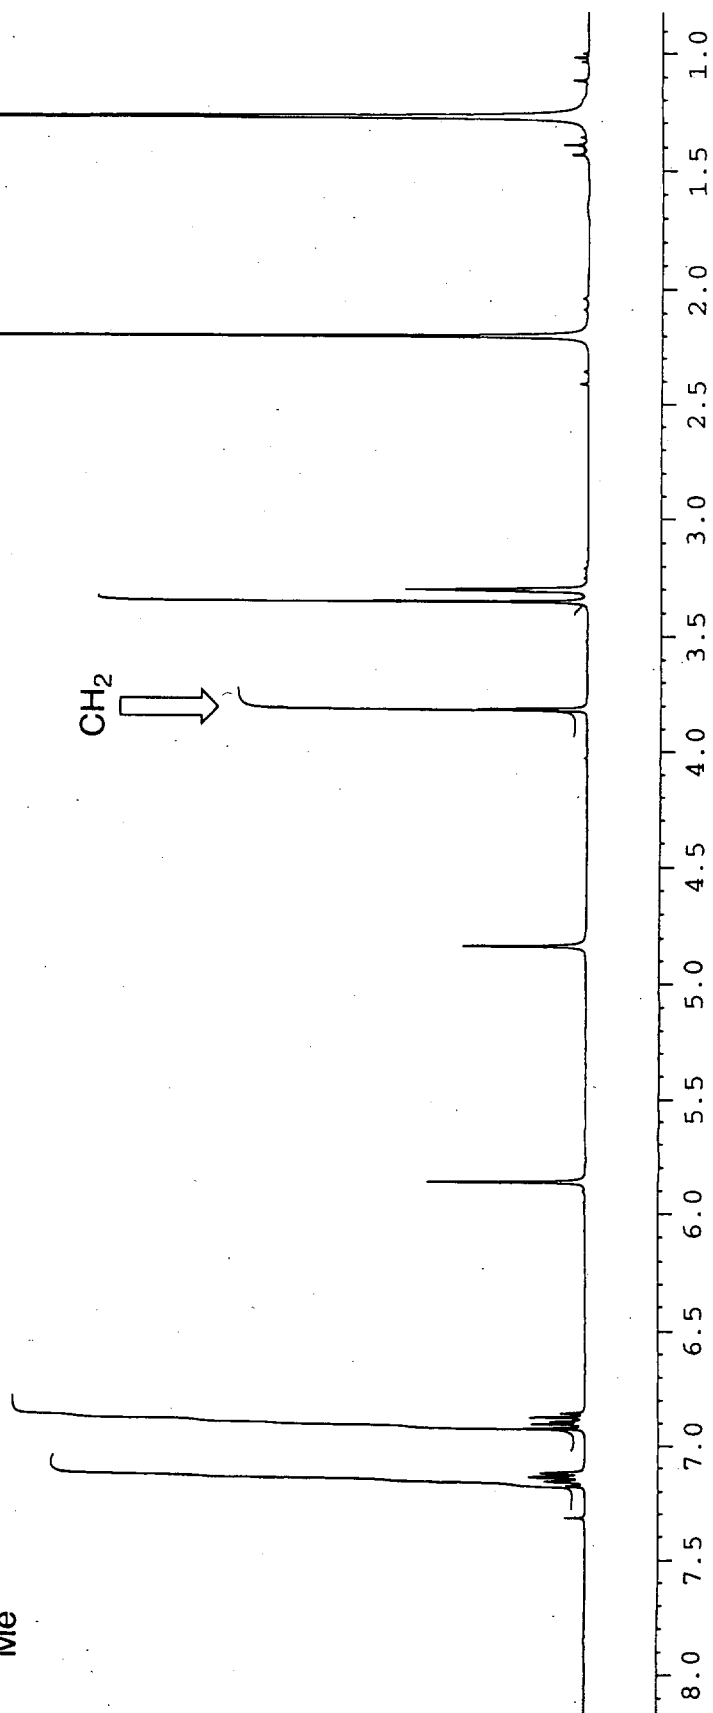

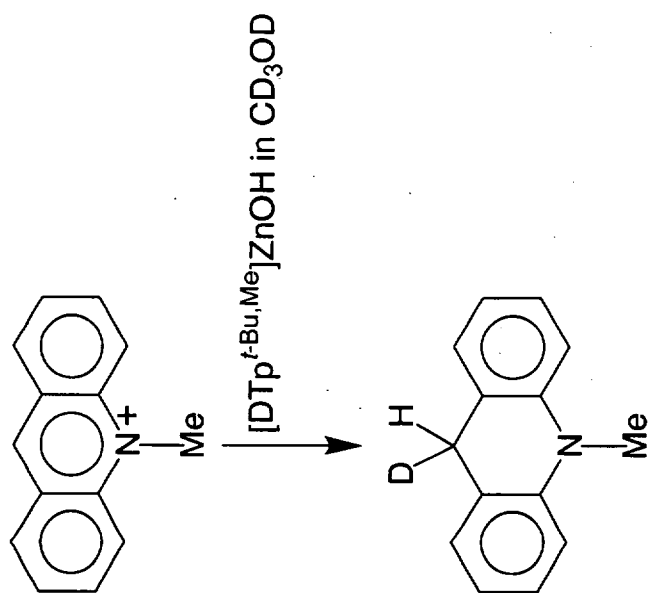

CH(D)

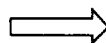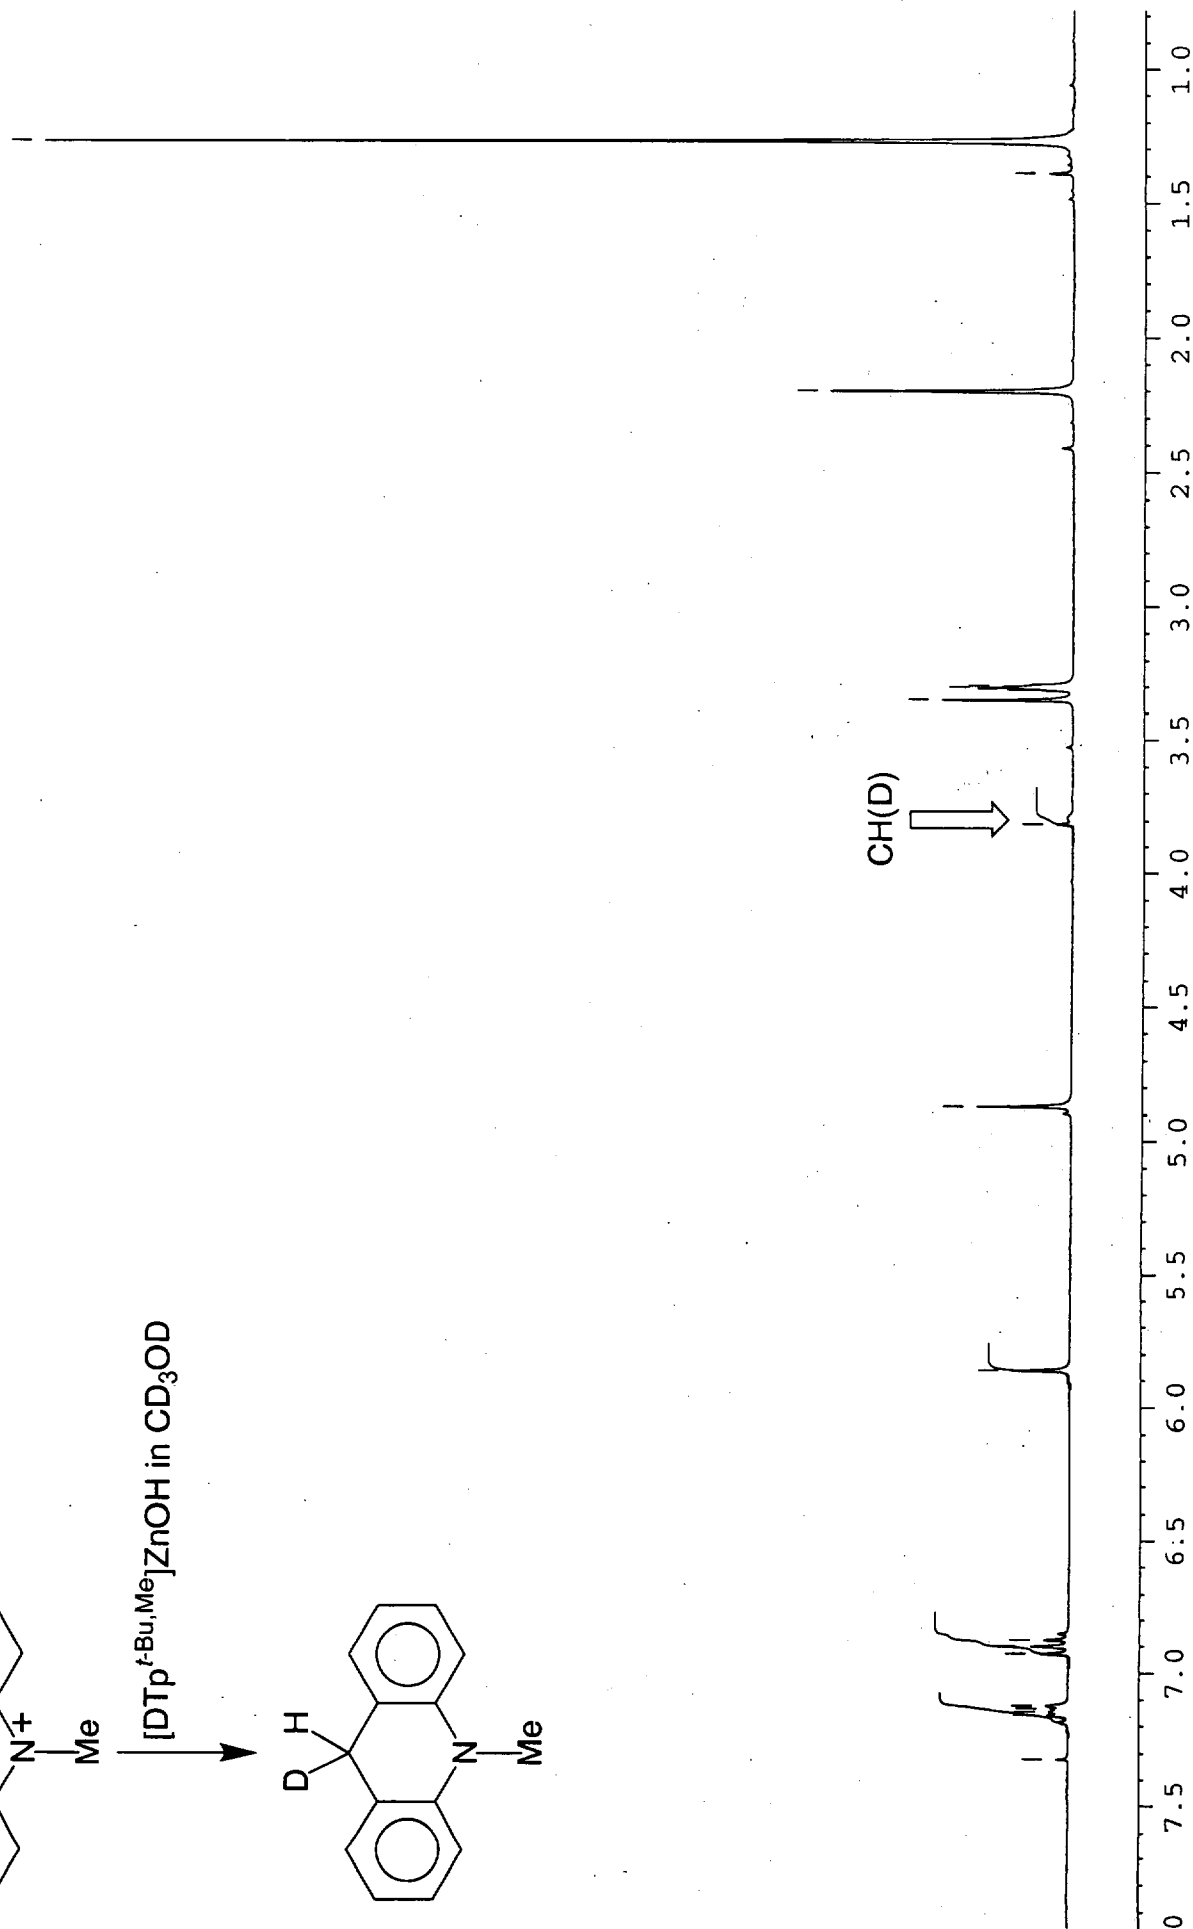

# <sup>2</sup>H NMR Spectrum

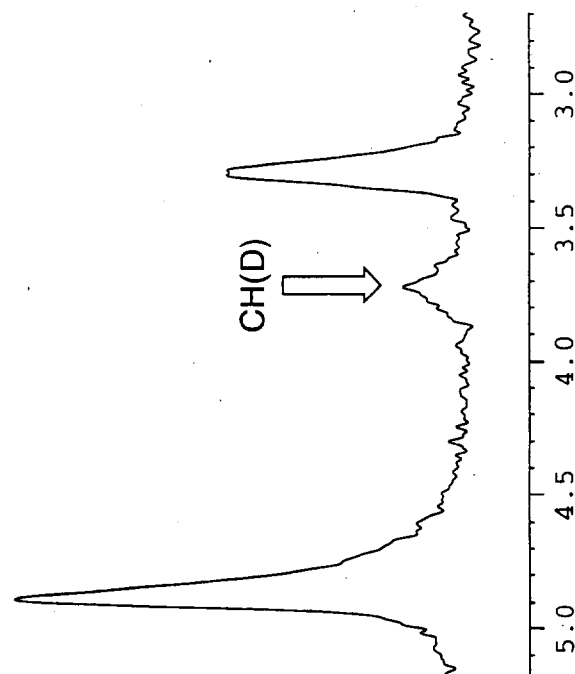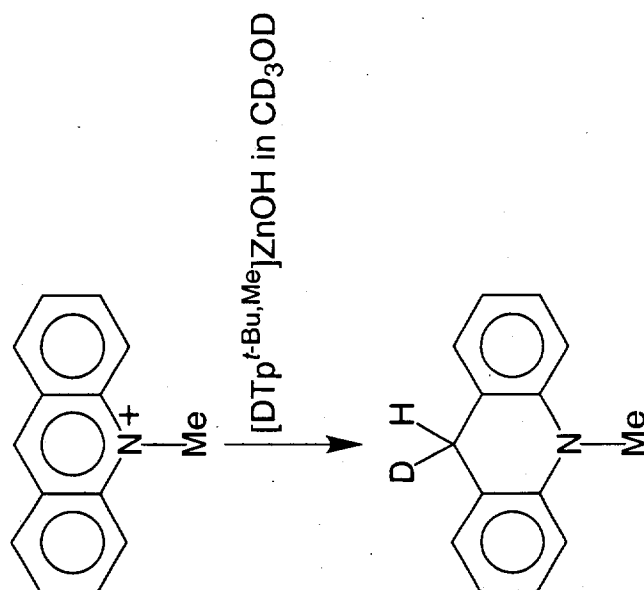



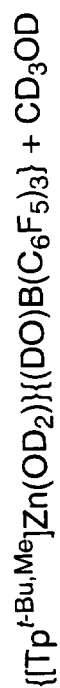

A =  $[\text{Tp}^t\text{-Bu,Me}]_2\text{ZnH}$

B =  $[\text{pz}^t\text{-Bu,Me}]_2\text{D}$

C =  $[\text{Tp}^t\text{-Bu,Me}]_2\text{ZnF}$

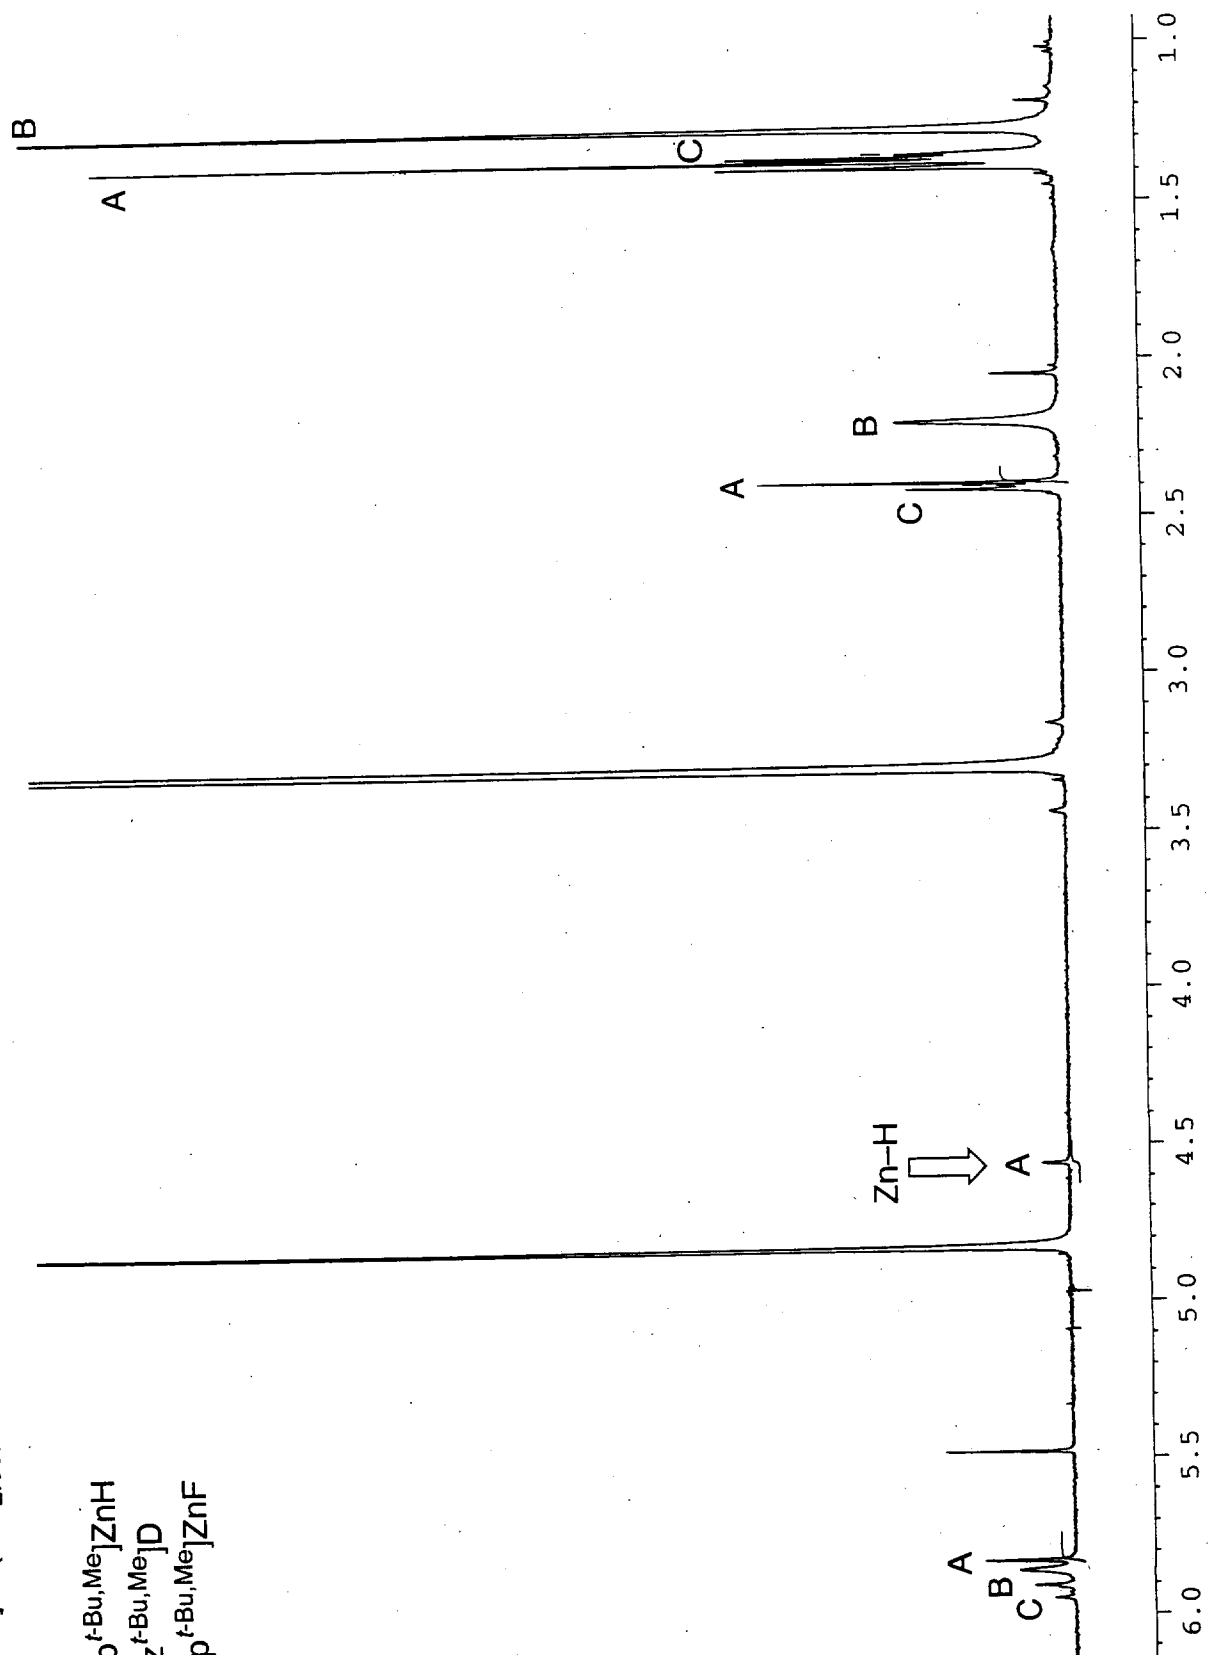

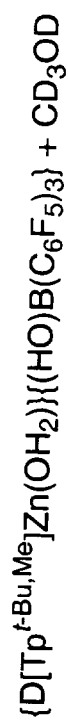

$^2H$  NMR Spectrum

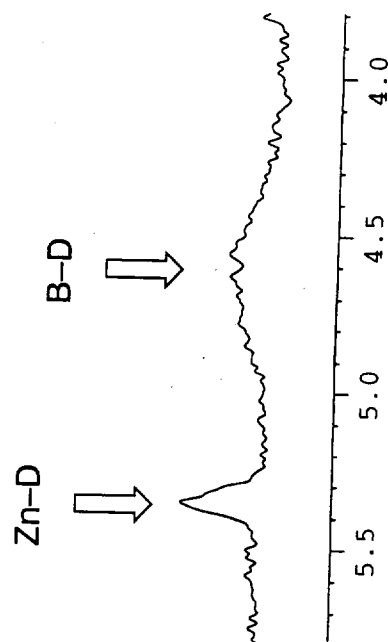

Supplement: Supplementary file 1 [file 5692788]
